# Supplementary material for: Membranes for Cation Transport Based on Dendronized Poly(Epichlorohydrin-Co-Ethylene Oxide). Part 2: Membrane Characterization and Transport Properties
Source: MDPI journal article supplement (doi:10.3390/polym13223915), 2021-11-12
Supplement: s1 [file s1]

## Supplementary Material

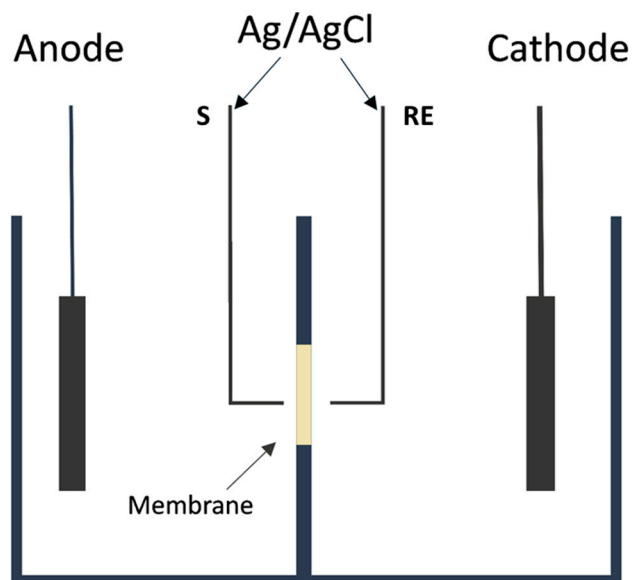

**Figure S1.** The experimental set-up for linear sweep voltammetry measurements. Anode (+) is working electrode (WE), Cathode (-) is counter electrode (CE), S is sensitive electrode and RE is reference electrode.

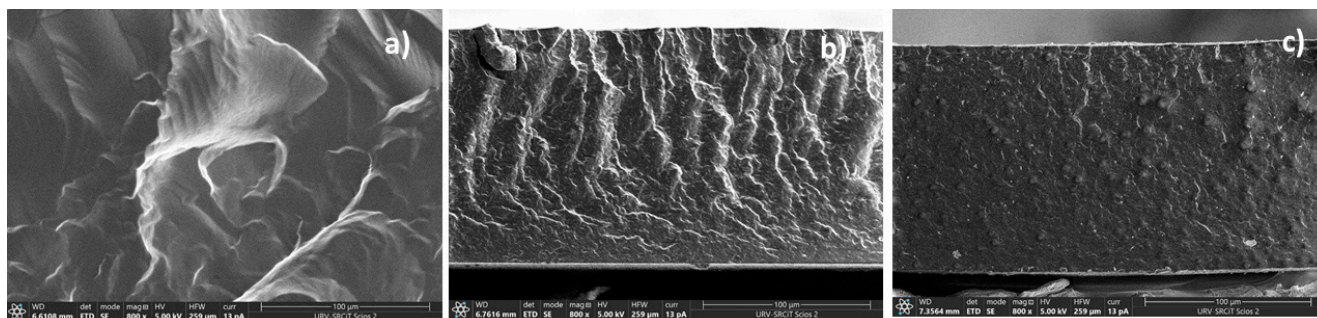

**Figure S2.** FESEM images of the membrane cross-sections: CP0 (a); CP20 (b); CP20 oriented (c).

**Table S1** Water Contact angle as determined on oriented CP20 and CP40 membranes after Proton Permeability experiment (PP) and Water Uptake test (WU).

| Sample      | Modification (%) | Contact angle (°)                           |                                             |
|-------------|------------------|---------------------------------------------|---------------------------------------------|
|             |                  | Oriented membrane after PP                  | Oriented membrane after WU                  |
| <b>CP20</b> | 20%              | 106 ± 2 <sup>a</sup> , 107 ± 1 <sup>b</sup> | 106 ± 2 <sup>a</sup> , 108 ± 3 <sup>b</sup> |
| <b>CP40</b> | 40%              | 124 ± 2 <sup>a</sup> , 122 ± 2 <sup>b</sup> | 130 ± 3 <sup>a</sup> , 130 ± 2 <sup>b</sup> |

<sup>a</sup> Air side; <sup>b</sup> Teflon side
